# Rational engineering of industrial *S. cerevisiae*: towards xylitol production from sugarcane bagasse

Fellipe da Silveira Bezerra de Mello<sup>a,¶</sup>, Carla Maneira<sup>a,¶</sup>, Frank Uriel Suarez Lizarazo<sup>a,b</sup>, Sheila Nagamatsu<sup>a</sup>, Beatriz Vargas<sup>a</sup>, Carla Vieira<sup>a</sup>, Thais Secches<sup>a</sup>, Alessandro L V Coradini<sup>a</sup>, Maria Augusta de Carvalho Silvello<sup>c</sup>, Rosana Goldbeck<sup>c</sup>, Gonçalo Amarante Guimarães Pereira<sup>a,\*</sup>, Gleidson Silva Teixeira<sup>a,c</sup>

<sup>a</sup>Department of Genetics, Evolution, Microbiology, and Immunology, Institute of Biology, University of Campinas, Campinas, São Paulo, Brazil

<sup>b</sup>School of Basic Sciences, University of Pamplona, Colombia

<sup>c</sup>School of Food Engineering, University of Campinas, Campinas, São Paulo, Brazil.

¶These authors contributed equally to this work

\*Corresponding author: [goncalo@unicamp.br](mailto:goncalo@unicamp.br)

**Keywords:** *Saccharomyces cerevisiae*, industrial strains, xylitol, metabolic engineering, reduced compounds, NADPH

## ABSTRACT

**BACKGROUND:** Sugarcane hemicellulosic material is a compelling source of usually neglected xylose that could figure as feedstock to produce chemical building blocks of high economic value, such as xylitol. In this context, *Saccharomyces cerevisiae* strains typically used in the Brazilian bioethanol industry are a robust chassis for genetic engineering, given their robustness towards harsh operational conditions and outstanding fermentation performance. Nevertheless, there are no reports on the use of these strains for xylitol production using sugarcane hydrolysate.

**RESULTS:** Potential single-guided RNA off-targets were analyzed in two preeminent industrial strains (PE-2 and SA-1), providing a database of 5'-NGG

1 20 nt sequences, and guidelines for the fast and cost-effective CRISPR-editing  
 2 of such strains. After genomic integration of a NADPH-preferring xylose  
 3 reductase (XR), FMYX (SA-1 *hoΔ::xyl1*) and CENPKX (CEN.PK-122 *hoΔ::xyl1*)  
 4 were tested in varying cultivation conditions for xylitol productivity to infer  
 5 influence of the genetic background. Near-theoretical yields were achieved for  
 6 all strains, however the industrial consistently outperformed the laboratory  
 7 strain. Batch fermentation of raw sugarcane bagasse hydrolysate with  
 8 remaining solid particles represented a challenge for xylose metabolism and  
 9  $3.65 \pm 0.16$  g/L xylitol titre was achieved by FMYX. Finally, quantification of  
 10 NADPH - cofactor implied in XR activity - revealed that FMYX has 33% more  
 11 available cofactors than CENPKX.

12 **CONCLUSIONS:** Although widely used in several *S. cerevisiae* strains, this is  
 13 the first report of CRISPR-Cas9 editing major yeast of the Brazilian bioethanol  
 14 industry. Fermentative assays of xylose consumption revealed that NADPH  
 15 availability is closely related to mutant strains' performance. We also pioneer  
 16 the use of sugarcane bagasse as a substrate for xylitol production. Finally, we  
 17 demonstrate how industrial background SA-1 is a compelling chassis for the  
 18 second-generation industry, given its inhibitor tolerance and better redox  
 19 environment that may favor production of reduced sugars.

## 20 **BACKGROUND**

21 The recent advancements in industrial biotechnology have enabled the  
 22 effective reuse of agro-industrial residues in a range of applications. Sugarcane  
 23 bagasse, for instance, is the major by-product of the sugarcane industry - a  
 24 billionaire market that employs millions of people worldwide [1]. The abundance  
 25 of this lignocellulosic material makes it an ideal substrate for exploring the  
 26 potentials of underutilized pentose sugars. Recently, the production of second-  
 27 generation bioethanol (E2G) from xylose-rich waste raised awareness on the  
 28 potential holistic utilization of this biomass [2]. However, many research groups  
 29 have lately assessed that the generation of alternative products, such as xylitol,  
 30 might stand out as an even more promising alternative to compensate for the  
 31 costs of fuel production from sugarcane substrates [3,4].

1 Xylitol is a five-carbon sugar alcohol that occurs naturally in certain  
2 fruits and vegetables [5]. It presents sweetness equivalent to sucrose while  
3 having just 60% of its calorie content, being mostly used as a natural sweetener  
4 in chewing gums [6]. Besides its well-established application in the food and  
5 beverage industry [7], xylitol has great potential in the pharmaceutical industry  
6 [2,8,9]. Altogether, xylitol properties speak for themselves when it comes to  
7 understanding why its demand is expected to grow in a market with increasingly  
8 health- and weight-conscious consumers. By 2025, xylitol market is expected to  
9 reach \$1.37 thousand million, with a price range of \$4000-5000 per tonne [10].

10 Biotechnological routes have been considered a relevant substitute to  
11 the conventional chemical method of xylitol production, as they can be based on  
12 a mixture of sugars and save on energy and substrate purification costs [2].  
13 There are reports of microbial processes based on bacteria, fungi, and yeast for  
14 xylitol production, being the last considered the best producers [11]. During  
15 these bio-based processes, D-xylose is reduced in a single step into xylitol by  
16 the NAD(P)H-dependent enzyme Xylose Reductase (XR), which is further  
17 secreted [12]. In order to enable high titre xylitol production in *S. cerevisiae*, the  
18 heterologous expression of *Scheffersomyces stipitis*' XR-encoding *XYL1* gene  
19 or overexpression of endogenous *GRE3* are common strategies that have been  
20 widely applied [13,14].

21 While xylitol production by genetically modified *S. cerevisiae* using non-  
22 detoxified hemicellulosic hydrolysates from corncob and rice straw has been  
23 reported [15–18], there is no register on the inquiry of sugarcane bagasse as  
24 substrate. In this context, the use of industrial yeast strains adapted to  
25 commercial fermentation, - especially the ones applied in the sugarcane-to-  
26 ethanol industry - stands out as important chassis towards enabling xylitol  
27 production in recalcitrant conditions [19]. Examples of top-performing  
28 indigenous *S. cerevisiae* encompass the Brazilian bioethanol strains Pedra-2  
29 (PE-2) and SA-1, that present outstanding fermentation capacity although  
30 subjected to numerous stresses [20]. Prospects on the use of these strains  
31 targeting the E2G industry have already been described: PE-2 has been  
32 explored for xylose consumption [21] and strain SA-1 was recently reported as  
33 highly resistant to major aldehyde inhibitors found in the sugarcane hydrolysate

1 - such as 5-hydroxymethylfurfural (HMF) and furfural [22]. These pieces of  
2 evidence indicate them as compelling chassis for xylitol production using  
3 sugarcane waste biomass.

4 In order to obtain relevant recombinant industrial strains for xylitol  
5 production, their rational genetic engineering seems necessary. Even though  
6 the CRISPR-Cas9 system is widely applied in *S. cerevisiae*, usage parameters  
7 are often strain-dependent and require fine adjusting [23]. PE-2 and SA-1 have  
8 a very specific genetic background, contrasting to the S288c model that has set  
9 the CRISPR-editing systems utilized in this microorganism. Besides presenting  
10 higher ploidy, these industrial strains were conditioned to specific environmental  
11 adaptations that resulted in a highly heterozygous genome [24], distinctive from  
12 the common haploid laboratory strains. Although very relevant, there are no  
13 reports of successful CRISPR-editing of Brazilian yeast strains of economic  
14 significance to the ethanol business.

15 Here, we assess the efficiency of xylitol production of engineered  
16 bioethanol *S. cerevisiae* strains after establishing optimal CRISPR-Cas9 editing  
17 parameters. We cover work towards mapping differences between single-  
18 guided RNA (sgRNA) sequences in PE-2 and SA-1 in relation to laboratory  
19 S288c, providing a sgRNAs database for these strains. We also set an efficient  
20 CRISPR-based genomic editing protocol for the working strains. Following,  
21 cultivation of an engineered SA-1 in rich media resulted in total xylose  
22 metabolization, and nearly theoretical xylitol yield was achieved. Regarding  
23 xylitol productivity in sugarcane bagasse hydrolysate, recombinant SA-1 was  
24 able to produce  $3.65 \pm 0.16$  g/L of the reduced sugar, outperforming mutant  
25 CENPK-122. NADPH quantification revealed that the industrial background has  
26 33% more cofactor availability than the laboratory, gathering evidence that  
27 aldehyde-resistant SA-1 has a favorable redox environment that can improve  
28 XR activity and serve as an interesting chassis for the second-generation  
29 industry.

# 1 MATERIALS AND METHODS

## 2 STRAINS, PLASMIDS AND MEDIA

3 All *S. cerevisiae* strains and plasmids used in this study are described in  
 4 **Table 1**. Yeasts were cultivated in YPD medium (10 g/L yeast extract, 20 g/L  
 5 peptone, 20 g/L glucose) for inoculum and propagation purposes, or YPD<sub>X</sub> (10  
 6 g/L yeast extract, 20 g/L peptone, 20 g/L xylose and varying glucose  
 7 concentration) for xylitol production assays. Cultivation was carried out at 30 °C  
 8 and 250 rpm, unless otherwise noticed. Assays were performed aerobically (80  
 9 mL medium in unsealed 250 mL Erlenmeyer flask) or semi-anaerobically (80  
 10 mL medium in rubber stopper-sealed 250 mL Erlenmeyer flask). Geneticin (200  
 11 µg/mL g418) was used for the selection of yeast transformants carrying a  
 12 KanMX marker, present in plasmid pGS. *Escherichia coli* DH5α was used for  
 13 propagation and storage of vectors and was cultivated in Luria-Bertani (LB)  
 14 broth (10 g/L tryptone, 5 g/L yeast extract, 10 g/L NaCl) at 37 °C and 250 rpm,  
 15 when in liquid media. Ampicillin (amp, 100 µg/mL) was added for the selection  
 16 of bacteria colonies expressing plasmids. All media previously described were  
 17 added 15 g/L of agar for solidification. Microorganisms stock solution were kept  
 18 at -80 °C in media containing 25% glycerol, for long term storage.

## 19 PE-2 AND SA-1 sgRNA OFF-TARGET ANALYSIS

20 All NGG PAM sequences (NoNAG) CRISPR-Cas9 targets in the yeast  
 21 genome, previously disclosed by DiCarlo *et al.* [25] were compared to the  
 22 publicly available genomes of both JAY291 [24] and FMY097 (SA-1 derived)  
 23 [26]. Further, off-target possibility was defined according to the recurrence of  
 24 sgRNAs - multiple identical sequences or bearing up to 3 single nucleotide  
 25 polymorphisms - using bowtie (version 1.0.0) (Langmead et al., 2009) set with  
 26 parameters -l 12 -v 3 -a. A homemade script in Perl was developed to count the  
 27 single polymorphisms differences identified in the alignment output (sam file) for  
 28 each reference (JAY291 and FMY097) and sgRNA.

## 29 sgRNAS SYNTHESIS AND ASSEMBLY

30 sgRNA sequences were predicted using CHOPCHOP [27] and the  
 31 sequences were compared to the off-target analysis previously performed. A

1 ligation-based cloning approach similar to that described by Laughery *et al.*  
2 (2015) [28] was performed. In summary, 300  $\mu$ M of complementary primers  
3 containing 20 bp overlap - target sequence - and 4 bp of homology to the  
4 expression vector were hybridized in a reaction containing 10  $\mu$ L of 10x T4-  
5 ligase buffer (New England Biolabs). The mixture was submitted to 70  
6 decreasing cycles of a minute each - touchdown - from 95 to 25°C and then  
7 connected to the previously linearized vector through a reaction containing 15  
8 ng of the previous hybridization, 50 ng linearized plasmid, 2  $\mu$ L of 10x T4-ligase  
9 buffer, and 1 U of T4-ligase (New England Biolabs). After ligation, each reaction  
10 was dialyzed and transformed into *E. coli*. After transformation, positive clones  
11 were selected on LB-amp. The sgRNA insertion was confirmed by PCR and  
12 sequencing.

### 13 **DONOR DNA SYNTHESIS**

14 Knock-out (KO) double-stranded donor DNAs (dsOligos) were  
15 synthesized using 55 bp DNA primers containing 20 overlapping nucleotides.  
16 The synthesis was carried out in a template-free Phusion High-Fidelity DNA  
17 Polymerase (ThermoFisher) reaction. Each reaction was kept in an appropriate  
18 thermocycler for 5-10 cycles of denaturation at 98 °C, annealing at 50 °C and  
19 extension for 15 seconds. The synthesis product - 90 bp dsOligo - was  
20 confirmed by gel electrophoresis using 2.5% agarose gel. Knock-in donors were  
21 amplified from genomic DNA. The homology regions for subsequent gene repair  
22 were either based on primer extensions (for homology regions up to 60 bp) or  
23 on previously amplified regions flanking the to-be-edited area.

### 24 **CLONING AND GENERAL MOLECULAR BIOLOGY**

25 The *XYL1* gene from *Sc. stipitis* was cloned in the *Bam*HI-digested p425-  
26 GPD [29] through gap repair in *S. cerevisiae*. The p425-XYL1 plasmid was used  
27 as the replication material for the XR donor cassette. All primers used in this  
28 study are described in the **Supplementary Material (Table S1)**. Plasmids  
29 propagated in *E. coli* were extracted using the alkaline lysis procedure  
30 described by Birnboim and Doly (1979) [30]. Yeast genomic DNA was extracted  
31 using the standard Phenol-Chloroform protocol [31]. Polymerase chain  
32 reactions (PCR) were carried out with Phusion High-Fidelity DNA Polymerase

(ThermoFisher) according to the manufacturer's instructions. Yeast transformation was performed using the LiAc/SS carrier DNA/PEG method, described by Gietz *et al.* (2007) [32]. Vectors were inserted in *E. Coli* using the traditional electroporation protocol [33].

## **HO locus NEUTRALITY TEST**

To confirm the neutrality of the *HO* gene KO genotype in the fitness of strains FMY001  $\Delta HO$ , CEN.PK-122  $\Delta HO$  and JAY270  $\Delta HO$ , their phenotype was assessed by biomass yield after growth in optimal conditions. In duplicates, cultivation of these strains in 20 mL of YPD was performed at 30 °C and 250 rpm of orbital shaking in unsealed 125 mL Erlenmeyer (aerobic growth). Optical density (OD<sub>600nm</sub>) of the culture was measured with a spectrophotometer after 12 hours of growth.

## **XYLITOL PRODUCTION ASSAYS IN YPDX**

Transformants were grown aerobically in YPD medium in Erlenmeyer flasks overnight for inoculum. The saturated culture was centrifuged at 2000g for 5 minutes and the cells were washed with sterile distilled water. The pellet was resuspended in order to achieve a fermentation initial OD<sub>600nm</sub> of 0.5 or 1.0. For the initial assays concerning xylitol productivity, strains FMYX, CENPKX and JAYX were cultivated in YPDX (5 g/L glucose), initial OD<sub>600nm</sub> 0.5, semi-anaerobic growth for 120h. HMF influence over xylitol productivity of strains FMYX and CENPKX was assessed with YPDX (5 g/L glucose) medium supplemented with 0.5 or 2 g/L HMF, in the same cultivation conditions previously mentioned. Analysis of xylitol productivity in varying cultivation conditions was carried out with strains FMYX and CENPKX in different settings: initial OD<sub>600nm</sub> of 0.5 or 1.0; glucose concentration of 10, 20 or 30 g/L; aerobically or semi-anaerobically for 104h. All cultivation assays were carried out in triplicates. Samples were withdrawn for HPLC analysis.

## **NADPH/NADP QUANTIFICATION**

NADP/NADPH concentration was measured using the NADP/NADPH-Glo (Promega) assay kit. All the *S. cerevisiae* strains used in this experiment were grown in YPD and harvested at the mid-exponential growth phase



1 (OD<sub>600nm</sub> 0.8 - 1.0). 1 mL of OD<sub>600nm</sub> 1.0 of each strain was centrifuged and  
2 resuspended in 150 µL of the NADP(H) extraction buffer. Further procedures  
3 followed the manufacturer's protocol.

#### 4 **XYLITOL PRODUCTION IN SUGARCANE HYDROLYSATE**

5 Steam-exploded sugarcane straw (23.9% solids) was donated by  
6 GranBio SA (Bioflex plant) and used for hydrolysate production. Operational  
7 conditions and chemical composition of the pretreated material were not  
8 disclosed. Cellic CTec3 (6% w/w glucan) was used for enzymatic hydrolysis,  
9 which occurred in 250 mL Erlenmeyer flasks containing 17g of pretreated  
10 sugarcane straw (dry basis) and distilled water to complete 100g total working  
11 volume. Ammonium hydroxide was used to adjust the pH to 5. Hydrolysis  
12 reaction occurred under 250 rpm agitation, at 50 °C, for 72 h. The same 250 mL  
13 Erlenmeyer flasks used for the enzymatic hydrolysis (100g reaction), added by  
14 4 ppm ampicillin, were used for fermentation. Fermentation occurred for 120  
15 hours with initial OD<sub>600nm</sub> 1, under the same conditions used for inoculum  
16 preparation (aerobic growth at 30 °C and 150 rpm). Samples were withdrawn for  
17 HPLC analysis. All fermentations were conducted in triplicate.

#### 18 **ANALYTICAL METHODS**

19 Glucose, xylose, xylitol, glycerol, acetic and formic acid, ethanol, furfural,  
20 and HMF concentrations were determined by high performance liquid  
21 chromatography (HPLC, Alliance HT, Waters, USA). Compounds separation  
22 occurred in a Bio-Rad HPX-87H column at 35 °C, using 5 mM sulfuric acid as  
23 mobile phase, at 0.6 mL/min. A photodiode array detector at 280 nm was used  
24 for furfural and HMF; a refractive index detector at 35 °C was used for the other  
25 compounds.

#### 26 **FERMENTATION PARAMETERS CALCULATION AND STATISTICS**

27 Fermentation parameters were defined as follows: xylose conversion (%)  
28 as the ratio of the amount of xylose consumed (g/L) by the initial xylose loading  
29 (g/L); xylitol yield (g/g) as the amount of xylitol produced (g/L) per consumed  
30 xylose (g/L); xylitol productivity (g/L.h) as the amount of xylitol produced (g/L)  
31 divided by fermentation time (h). All data are presented as mean ± standard



deviation. Statistical analysis between means was assessed with Tukey's test (0.95 confidence interval), calculated using Minitab version 17 (Minitab Inc., State College, PA, USA).

## RESULTS

### **Efficient sgRNA design based on specific genome information is key for editing industrially relevant strains**

With the consolidation of CRISPR-Cas9 as one of the most effective DNA editing tools in *S. cerevisiae*, precise sgRNA design for the endonuclease activity is often the foremost step when one intends to modify genomic sequences. A primary effort into the rational genetic engineering of wild type strains - such as bioethanol yeasts PE-2 and SA-1 [20] - is to consider how their genomes differ from the S288c model. As most of the trustworthy sgRNA prediction analysis software relies on the model yeast S288c for establishing its efficiency prognosis, the degree of accuracy of these programs can be limited in strains with diverging backgrounds. For instance, single nucleotide polymorphisms' (SNP) presence in PE-2 is calculated to be as high as 65,000 when analyzing the whole genome in comparison to S288c [24]. Therefore, a complete analysis of all possible sgRNAs encompassed in PE-2 and SA-1 genomes and their mismatch probability in relation to S288c sgRNAs was performed.

In summary, all CRISPR-Cas9 NoNAG targets in the yeast genome, previously disclosed by DiCarlo *et al.* (2013) [25] were compared to the publicly-available genomes for both the JAY291 strain [24] - PE-2 haploid derived from the JAY270 diploid - and the FMY097 strain [22,26] - haploid derived from the FMY001 strain – SA-1 diploid-derived. The analysis detected sgRNAs with identical hits in the industrial strains' genomes, as well as highly similar sgRNAs that could lead to off-target activity of the Cas9 enzyme. SgRNAs were considered to lead to off-targets due to either (1) the existence of another fully identical 20bp DNA sequence 5' to a PAM in the genome, (2) the presence of highly similar sequences (up to 3 bp differentiating them), (3) the nonexistence of the original sgRNA sequence found in the S288c analysis or (4) a combination of these events. The full list of potential sgRNAs and their off-target

1 probabilities in PE-2 and SA-1 in relation to all S288c NoNAGs has been  
2 provided in .csv files (**See Supplementary Files, Tables S2 and S3**). **Figure 1**  
3 shows a graphical overview of the results obtained.

4 For PE-2, out of the 524,288 sgRNAs predicted for the s288c model,  
5 511,433 found hits in the PE-2 genome, 85.8% of them were considered  
6 suitable, while the other 14.2% were classified as ineligible due to one of the  
7 four off-target criteria. As for SA-1, there were 513,159 hits in the genome:  
8 85.6% were considered suitable, while 14.4% were disqualified. In both  
9 analyses, sequences were mainly classified as unsuitable due to nonexistence  
10 of the original sgRNA sequence, followed by off-target due to similarity (up to 3  
11 mismatches).

## 12 **Synthesis of CRISPR-Cas9 editing components for Brazilian bioethanol** 13 **strains**

14 Following genome-wide sgRNA screening in industrial strains PE-2 and  
15 SA-1, we proceeded to establish a simple and cost-effective yeast  
16 transformation toolkit for our strains. When it comes to the CRISPR-Cas9  
17 system delivery, an approach similar to that described by Stovicek *et al.* (2015)  
18 [23] was chosen. However, a single-plasmid (named pGS) plus double-stranded  
19 oligo system was applied to simplify the process. pGS bears both the Cas9  
20 gene under the strong TEF1 promoter, and the sgRNA spacer 5' to the SNR52  
21 promoter. Additionally, for the easy cloning of sgRNAs into the plasmid, a  
22 single-enzyme-based restriction and ligation strategy was implemented. The  
23 complete strategy is detailed in **Material and Methods** (see **Supplementary**  
24 **Figure S1A**).

## 25 **Effective CRISPR-Cas9 editing in the Brazilian industrial yeast strains**

26 In order to establish optimal transformation conditions for our strains, we  
27 selected the JAY270 strain (PE-2 isolate) as a model yeast for this assay. The  
28 KO of the *URA3 locus* was chosen for this assessment, due to the ease in  
29 screening for edited colonies based on auxotrophy. In short, JAY270 was  
30 subjected to 15 different transformation conditions bearing variable  
31 concentrations of the Cas9-sgRNA pGS vector and the donor DNA - a 90 bp

dsOligo with a stop codon replacing the PAM. The sgRNA sequence used for this purpose was validated using the information provided in the first result section. As depicted in **Figure 2A**, the editing efficiency was over 95% for 4 out of the 15 tested conditions. The condition bearing 1500 ng of the vector and 1000 ng of the donor DNA stands out with a 99% efficiency rate (**Figure 2A**). This condition was classified as optimal and used in all subsequent transformation events for both the PE-2 and SA-1 strains.

After confirming the system functionality for KOs, we then assessed efficiency for whole-gene integration. The JAY270ΔURA3 strain was used as a background for a gene knock-in transformation assay. The optimal transformation condition (1.5 μg pGS and 1 μg donor DNA) was applied for re-integration of the *URA3* gene into the previously disrupted *URA3 locus*. Additionally, two donor DNA homology-overhang with varying lengths were tested. As already observed in previous works, a correlation between editing efficiency and the length of donor DNA overhang homologies is shown in **Figure 2B**.

Due to the high number of edited colonies (on average 97.5) for the donor DNA bearing 1 Kb-long homologies this condition was considered excellent. However, even low-cost options such as the use of the donor DNA bearing 60 bp-long homologies were considered pertinent (on average yielded 6 edited colonies). Overall, the knock-in assay using pGS and previously described transformation conditions led to successfully edited colonies, proving the efficiency of the CRISPR-Cas9 system and transformation method for gene integration for the PE-2 strain.

In a similar fashion, we tested the efficiency of the system here described to edit haploid cells. LVY34.4 [21], a haploid derivative of the PE-2 strain, was subjected to this methodology for the KO of the *LEU2 locus*. Again, high editing efficiency rates very close to 100%, as well as a high number of edited colonies (92 out of 93 successfully transformed colonies) were obtained (**See Supplementary Figure S2**).

### **XYL1 integration in diploid industrial strains**

1           Following, we sought to apply the herein developed CRISPR-based  
2 genome editing toolkit to endow widely used bioethanol strains JAY270 (PE-2)  
3 and FMY001 (SA-1) with higher xylitol production performance. For that, the  
4 integration of a *SsXYL1* expression cassette was designed in the *HO locus*  
5 (HOMothalic switching endonuclease). The top-indicated sgRNA for editing the  
6 *HO* allele enclosed a SNP - corresponding to nucleotide 789 in the gene ORF -  
7 in the industrial PE-2 and SA-1 strains when compared to the model S288c. In  
8 fact, sequencing of both strains uncovered that diploid SA-1 is heterozygous for  
9 this mutation, while PE-2 is homozygous. Plasmids pGS.29 and pGS.30 were,  
10 therefore, designed to contain sgRNAs targeting each variation of the *HO locus*.  
11 The plasmids contained a single base-pair mutation in the sgRNA sequence  
12 differentiating between them (**see Supplementary Table S1**), allowing the  
13 specific editing of PE-2 or CEN.PK-122, respectively. Importantly, the diploid  
14 laboratory strain CEN.PK-122 [34] - harboring the same *HO* sequence as in  
15 S288c - was selected as a control to guarantee a proper evaluation of the  
16 industrial background influence in xylitol production, explored in the next  
17 sections.

18           Effective sgRNA design was assessed in transformations containing  
19 solely the pGS plasmid (no donor DNA co-transformed). As Cas9-induced  
20 double strand break is preferably repaired by homology-directed mechanisms in  
21 *S. cerevisiae* [35], a high incidence of cell-death - leading to an easy-to-spot low  
22 colony count pattern - is achieved when no donor DNA is co-transformed with  
23 an efficient sgRNA-containing plasmid. Being so, a transformation of both  
24 industrial strains and the control with pGS.29 and pGS.30 alone, revealed that  
25 the single base-pair change was crucial for the Cas9 endonuclease activity -  
26 *i.e.*, pGS.29 successfully edited PE-2 and not CEN.PK-122, while pGS.30 only  
27 worked for the latter. Both plasmids did not present activity on SA-1, given its  
28 heterozygous *locus* (**See Supplementary Figure S3**). Being so, SA-1  
29 transformation was carried out separately in segregant haploids FMY034  
30 (MAT $\alpha$ ) and FMY097 (MATa) [22] - both with the same SNP in gene *HO* as in  
31 PE-2 - and further crossed.

32           Following the confirmation of effective sgRNAs for all strains, we  
33 investigated the *HO* KO neutrality in the industrial strains' fitness, given that no

information regarding this genotype is available for such yeast background. A non-coding cassette, pGAP-tCYC1, was integrated into SA-1 and PE-2's gene using pGS.29. Growth of *HO* knocked-out strains in optimal conditions certified that this allele interruption does not affect cell cultivation for these strains (**See Supplementary Figure S4**).

Next, the *XYL1* expression cassette (pGAP-SsXYL1-tCYC1) was integrated into CEN.PK-122 and PE-2 genomes, with 40 bp flanking homology, leading to 11% and 28% editing efficiency, respectively. Subsequently, the donor cassette was amplified from the transformed PE-2 with 300 bp overhang homology to the editing site and used in the transformation of SA-1 segregants, resulting in 83% editing efficiency (**See Supplementary Figure S5**). Edited strains were labeled CENPKX (CEN.PK-122 *hoΔ::xyl1*), JAYX (PE-2 *hoΔ::xyl1*) and FMYX (FMY034/FMY097 *hoΔ::xyl1*).

### **Xylitol production by modified bioethanol Brazilian strains: a prospect**

In this section, we explore how edited strains perform regarding xylitol productivity, and investigate whether the industrial background inflicts any difference in the xylose metabolism. Specifically, we evaluate the hypothesis that aldehyde-resistant SA-1 has a better redox environment, since most reductases that take part in HMF or furfural detoxification reactions are NADPH-dependent - the same cofactor required by XR activity -, and therefore represent a good chassis for metabolic engineering envisioning the production of reduced sugars.

Before proceeding to an in-depth analysis of xylitol productivity in the transformed strains, a preliminary assay to assess CENPKX, JAYX, and FMYX performance on xylose-containing media was carried out (**Figure 3**). Oxygen-limiting batch cultivation was performed in order to mimic the cultivation conditions typically performed in the Brazilian E2G industry [36], aiming at the possibility of using the same operational infrastructure for xylitol production. After 120h of semi-anaerobic cultivation on YPD<sub>X</sub>, CENPKX and FMYX produced similar concentrations of xylitol (6.08 g/L and 5.57 g/L, respectively), while JAYX had limited production of 2.60 g/L (**Figure 3A**). Even though all strains showed substantially superior xylitol productivity in relation to their wild-

type counterparts, PE-2 performance was surprisingly the lowest. Next, strains CENPKX and FMYX were evaluated for xylitol production in the presence of (HMF (**Figure 3B**). FMYX was able to maintain productivity even when 2 g/L of the aldehyde is present in the medium, while the laboratory failed to keep up with the xylitol titre obtained in control. This result, together with the low xylitol production observed in PE-2, were key to choosing FMYX for the next experiments.

## Industrial background favors xylitol production in *XYL1* expressing yeast

Here we explore how the xylose:glucose ratio, aeration conditions and cell inoculum can affect xylitol production of strains FMYX and CENPKX in batch cultivation. Such evaluations have been traditionally documented in genetically modified *S. cerevisiae* [37], and re-analyzed in this study in order to understand if the strains' backgrounds influence xylitol productivity - given that the same genomic edition was performed in both. Xylose consumption and xylitol production graphs are presented in **Figure 4** and the complete dataset in **Table 2**.

First, to understand the effect of co-substrate availability in xylitol production in modified SA-1 and CEN.PK-122, the strains were submitted to cultivation assays with different xylose:glucose ratios. The assay was carried out with 20g/L xylose, full aeration, an initial OD<sub>600nm</sub> of 0.5 and varying concentrations of glucose (10, 20 and 30 g/L) (**Figure 4A**). For both strains, 10 g/L of glucose prevented the complete consumption of xylose, and a residual amount of the last is present after 104 hours of cultivation. Higher concentrations of the co-substrate allowed the complete metabolization of xylose by both strains. Regarding xylitol production, laboratory strain CENPKX peaks at  $14.54 \pm 0.09$  g/L for the cultivation with 20 g/L glucose, while FMYX has the best overall performance with 30 g/L of the co-substrate, producing  $15.74 \pm 0.36$  g/L xylitol.

Following, we tested xylitol productivity performance of transformed strains in semi-anaerobic cultivations (**Figure 4B**), maintaining an initial OD<sub>600nm</sub> of 0.5 and a ratio of 20:30 (xylose:glucose) concentration. Higher glucose concentration was chosen to resemble typical sugarcane hydrolysate. The

oxygen-limiting environment resulted in lower xylitol titre ( $10.75 \pm 0.75$  g/L) for FMYX in comparison to the aerated cultivation and statistically different xylitol yields (0.91 and 0.71, respectively). At the same time, CENPKX reduced its overall xylitol titre, but no difference was observed in this sugar yield between the different oxygenation cultivation scenarios.

Finally, to test whether the initial inoculum affects xylitol productivity of strains CENPKX and FMYX, we have cultivated both strains with 30 g/L glucose, 20 g/L xylose, full aeration, and varied initial  $OD_{600nm}$  - 0.5 or 1.0 (**Figure 4C**). For both strains, we observed the same behavior: higher initial cell concentration allowed higher xylitol titre. For CENPKX, xylitol concentration after 104 h cultivation increased from  $12.83 \pm 0.27$  g/L ( $OD_{600nm}$  0.5) to  $15.38 \pm 0.24$  g/L ( $OD_{600nm}$  1.0). Meanwhile, industrial FMYX was able to produce  $15.74 \pm 0.36$  g/L and  $16.97 \pm 0.10$  g/L xylitol when  $OD_{600nm}$  was 0.5 and 1.0, respectively. Again, FMYX outperformed CENPKX in both scenarios.

## **Batch fermentation of raw sugarcane bagasse hydrolysate for xylitol production**

We then proceeded to evaluate the possibility of using sugarcane bagasse hydrolysate - traditionally used in the Brazilian E2G industry [36] - to produce xylitol using strains FMYX and CENPK.

Sugarcane straw was donated by GranBio SA (Bioflex plant) and hydrolysis was performed with Cellic CTec3. Cells were further inoculated at  $OD_{600nm}$  1 and cultivated with aeration. Xylitol productivity was assessed in the same operational process conditions as is in E2G: batch fermentation of non-detoxified hydrolysate with remaining solid phase [36] (**Figure 5**). The hydrolysate composition is presented in **Table 3** and xylitol productivity of FMYX and CENPKX, in **Table 4**. The harsh fermentation conditions revealed a challenge for xylitol productivity in both strains, yielding  $3.65 \pm 0.16$  g/L and  $1.04 \pm 0.45$  g/L (p-value =  $7.0E-04$ ) for FMYX and CENPK, respectively. In fact, CENPKX was not even able to consume glucose after 120h of fermentation, while FMYX did metabolize all the co-substrate and some of the xylose available.



# 1    **The redox environment of SA-1 and CEN.PK-122**

2            Next, we sought to uncover why strain FMYX outperformed CENPKX  
3    regarding xylitol production, especially in stress-free scenarios. Because FMYX  
4    and CENPKX have just one copy of *XYL1* integrated in the genome, higher  
5    xylitol titres obtained by the first must be related to the strains' background prior  
6    to the genomic editing. Complete metabolization of xylose could explain the  
7    diverging results. Although *S. cerevisiae* is known to have genes homologous to  
8    xylose dehydrogenase (XDH) enzymes (such as *XYL2*), there is conflicting  
9    evidence whether xylose can induce its activity in converting xylitol to xylulose  
10   [38]. Even though xylose conversion to ethanol could have impaired CENPKX's  
11   xylitol productivity, maximum alcohol titre produced by the strain is  $11.53 \pm 0.35$   
12   g/L, compared to  $12.66 \pm 0.11$  g/L by FMYX, in the last cultivation condition  
13   tested. Therefore, this fails to explain the performance difference between  
14   strains.

15            As previously stated, cofactor regeneration is crucial for xylitol production  
16   in *S. cerevisiae*, given that commonly used reductases are NADPH-dependent  
17   and xylose metabolism is incomplete for that goal. Accordingly, we moved on to  
18   test whether there is a contrast in reduced cofactors that could enhance XR  
19   activity and further xylose conversion in FMYX. Relative NADPH in exponential  
20   growth at optimal conditions was assessed by a luminescence assay using the  
21   transformed and wild-type strains - SA-1 and CEN.PK-122 (**Figure 6**). The  
22   results confirm that industrial SA-1 has 33% more NADPH than laboratory  
23   CEN.PK-122 (p-value =  $3.0E-04$ ), and that *xy1* genomic integration has not  
24   affected cofactor availability in FMYX while CENPKX fell behind in performance  
25   compared to its wild-type counterpart. CENPKX has only 59% of the amount of  
26   cofactor available in CEN.PK-122 (p-value <  $1.0E-04$ ).

# 1 1. DISCUSSION

2 In summary, our results show the development of a functional CRISPR  
3 engineering method for diploid strains PE-2 and SA-1 and set the basis for  
4 xylitol production using sugarcane bagasse, while unraveling the rationale  
5 behind the excellent performance of the industrial FMYX. Engineering  
6 such widely used bioethanol yeast is relevant given that their robust background  
7 and adaptability to harsh fermentation conditions result in recombinant *S.*  
8 *cerevisiae* suitable for industrial applications. In this context, commercial bio-  
9 fabrication of xylitol using *S. cerevisiae* stands out as a promising alternative to  
10 the chemical route.

11 When it comes to CRISPR-engineering of the Brazilian bioethanol  
12 strains, the developed sgRNA prospection confirms the noteworthy genetic  
13 difference between tailored industrial strains and the S288c model, backing up  
14 the necessity of analyzing sgRNA efficiency in different yeast strains in addition  
15 to using the available prediction tools. For both strains analyzed here, a total of  
16 14% of the sequences predicted to be efficient in the S288c model had high  
17 chances of leading to off-target Cas9 activity. Even though high accounts of  
18 genetic diversity and complex population structure in the so-called budding  
19 yeast is notorious for the scientific community [39], the use of the S288c model  
20 as the sole source of genetic information for many important inquiries and  
21 assays remains true. When it comes to sgRNA prospection, coupling the  
22 available sgRNA-prediction software with in-depth investigations into relevant  
23 strains' genome comes in hand to guarantee efficient rational editing.

24 Regarding the assembly and transformation of the editing-parts,  
25 improvements allowed for fast and cheap protocols with high editing rates. Even  
26 though many single plasmid based CRISPR strategies have been developed for  
27 *S. cerevisiae* [40–45], they differ greatly when it comes to sgRNA insertion  
28 strategies and overall editing efficiency. In our system, the single-restriction  
29 methodology of the pGS plasmid allows for the fast exchange of sgRNAs.  
30 Additionally, when applied in co-transformation with a donor DNA, sgRNA-  
31 containing pGS induced high percentages of editing effectiveness - above 97%  
32 when 1500 ng of the vector and 1000 ng of the donor DNA were applied.

1 While high concentration of donor DNA is crucial for the general  
2 efficiency of the editing system, pGS concentration plays a decisive role in the  
3 final count of edited colonies. The highest donor DNAs concentration tested (1  
4 µg, 16.83pmols) led to efficiency rates very close to 100% in disrespects of the  
5 plasmid concentration, while low concentrations often led to low-efficiency rates.  
6 On the other hand, transformation events bearing the highest plasmid  
7 concentration (1.5 µg, 0.23 pmols) led to a generally greater number of edited  
8 colonies, when comparing across the same donor concentrations. This is  
9 especially true for co-transformation with 1 and 0.5 µg of donor DNA.  
10 Interestingly, moderate concentrations of the sgRNA and Cas9-bearing plasmid  
11 (100ng-500ng), which are commonly applied in *S. cerevisiae* genome editing,  
12 were found not to be as effective in our strains. These results are true for the  
13 wild-type diploid PE-2 as well as a haploid derivative of the strain. Although  
14 polyploid strains are more suitable for industrial fermentation, their segregants  
15 are typically used for the construction of robust hybrids [46,47], herein the  
16 importance of the system effectiveness in haploid strains of industrial relevance.

17 After establishing optimal conditions for genome editing with the  
18 CRISPR-Cas9 system, PE-2 and SA-1 were put to test. High titre xylitol  
19 production in indigenous yeast commonly requires the expression of  
20 heterologous enzymes, since the endogenous aldose reductase (coded by  
21 gene GRE3) displays low rates of d-xylose catabolism. Although there are  
22 reports of chromosomal integration of xylose reductase in *S. cerevisiae*, no  
23 work describes the use of a CRISPR-Cas9 system for this purpose. Also,  
24 genome editing of the relevant industrial strain SA-1 is first described in this  
25 study.

26 The HO locus – responsible for the mating-type switch in *S. cerevisiae* –  
27 was chosen for the introduction of XYL1. Prior to the insertion, HO's  
28 documented inert function in cell fitness [48] was confirmed for the bioethanol  
29 strains used in this work. A SNP in HO between the industrial yeasts and the  
30 laboratory CEN.PK-122 demanded specific sgRNA sequences for successful  
31 Cas9 activity in each strain. This finding corroborates with the importance of  
32 sgRNA screening in non-conventional *S. cerevisiae* prior to their genetic  
33 engineering. Again, sgRNAs suggested by popular design tools based on model

1 yeast genome would fail to be functional, leading to time-consuming sgRNA  
2 survey. The database provided in this study shortens the efforts for sgRNA  
3 efficiency-check in major strains PE-2 and SA-1.

4 Prospect of xylitol productivity in mutant strains in oxygen-limiting batch  
5 fermentation - scenario typically found in the Brazilian E2G industry [36] -  
6 revealed that PE-2's performance was restricted compared to the other strains.  
7 Previous report on the use of a GRE3 episomal overexpressing PE-2 in xylitol  
8 production with aeration [15] shows good performance of this chassis,  
9 suggesting that the semi-anaerobic environment hampered JAYX execution.  
10 Testing of xylitol productivity in presence of HMF revealed that edited SA-1 was  
11 able to maintain its performance when 2 g/L of the aldehyde was present in the  
12 medium, while CENPKX failed to keep up with the xylitol titre obtained in the  
13 control condition. 2 g/L HMF have been described as highly damaging to xylitol  
14 production in oxygen-limiting xylitol batch fermentation [49], confirming the  
15 outstanding FMYX performance. Besides assessing productivity in conditions  
16 with fermentation inhibitors that resemble lignocellulosic hydrolysates, xylitol  
17 production in the presence of HMF also corroborates with the hypothesis that  
18 SA-1 has a better redox environment. Bearing in mind that formyl detoxification  
19 is conducted by multiple NADPH-dependent aldehyde reductases (e.g., ARI1,  
20 ADH6, ADH7) [50], HMF-resistant strains might be suitable for better XR activity  
21 and, consequently, xylitol production.

22 The influence of varying co-substrate ratio, aeration and initial cell  
23 density on xylitol productivity have already been examined in other strains  
24 [18,37], and here revisited to explore the different chassis effect over xylose  
25 metabolization. Varying cultivation parameters in optimal conditions were tested  
26 to evaluate how the genetic background influences xylitol productivity in strains  
27 CENPKX and FMYX. Because the sole expression of genes encoding XR  
28 prevents the use of xylose as a carbon source for energy maintenance, the  
29 regeneration of cofactors and cell growth is dependent on co-substrates - such  
30 as glucose. At the same time, xylitol productivity in mutant *S. cerevisiae* relies  
31 on the availability of NADPH - regenerated in the oxidative part of pentose  
32 phosphate pathway (PPP) - for the activity of a reductase.

1           While xylose uptake into the cells is inhibited by glucose [51], we chose  
2   this co-substrate to mimic the conditions in sugarcane hydrolysate fermentation,  
3   where this is the most prominent carbon source for *S. cerevisiae*. A fixed  
4   concentration of 20 g/L xylose was used throughout this assay to achieve a  
5   higher turnover rate for the reductase and guarantee a higher xylitol formation  
6   rate [37]. When altering glucose concentration regarding xylitol, industrial FMYX  
7   presented a better overall xylitol productivity in the same conditions evaluated  
8   for the laboratory. CENPKX underperforms when 30 g/L of the co-substrate is  
9   present in the medium, indicating a possible glucose repression scenario.  
10   Indeed, 20:30 xylose:glucose ratio is the closest to an industrial scale  
11   fermentation [52], substantiating that FMYX should be more appropriate for this  
12   purpose.

13           Regarding oxygen availability, Hallborn *et. al* [37] have previously  
14   suggested that limited oxygen supply favors xylitol production because less  
15   NAD(P)H is spent on ATP production. Nevertheless, our results show the  
16   opposite - especially for industrial FMYX -, proposing that the yeast background  
17   indeed plays an important role in xylitol productivity. In fact, further work on  
18   xylitol production by recombinant *S. cerevisiae* usually apply aeration for xylose  
19   metabolization [13], supporting our findings. The difference of xylitol titre  
20   between strains in semi-anaerobiosis again reveals a tendency of industrial  
21   FMYX to produce more of the reduced sugar.

22           The positive effect of higher initial cell density in xylitol productivity has  
23   been previously reported by Kogje and Ghosalkar (2017) [18], corroborating  
24   with our results. More yeast cells guarantee that the co-substrate is fully  
25   metabolized through the PPP and NADPH is regenerated for the xylose  
26   reductase activity. Overall, in the conditions tested, edited industrial SA-1  
27   outperformed the laboratory CEN.PK-122 expressing a XR, confirming that the  
28   genetic background plays a key role in xylitol productivity, even in a stress-free  
29   cultivation environment.

30           Although bio-based xylitol production has been widely explored,  
31   sugarcane bagasse fermentation using *S. cerevisiae* has not yet been  
32   documented for this purpose. One of the challenges of using sugarcane

1 hydrolysate in whole-cell fermentation resides in the inhibitory nature of several  
2 pretreatment by-products. While such hemicellulosic feedstock has been tested  
3 for xylitol production using yeast *Candida guilliermondii* [53,54], approaches  
4 using recombinant *S. cerevisiae* have been limited to either corn cob  
5 [15,17,18,55], rice straw or woody biomass [16,56] as natural xylose sources.  
6 Using sugarcane biomass to produce high added-value chemicals with *S.*  
7 *cerevisiae* is a prospect for future biorefineries [57], and our experiments join  
8 this discussion.

9 For xylitol production using sugarcane bagasse, similar conditions  
10 applied in the Brazilian industrial E2G were used in order to simulate the  
11 performance of the existing infrastructure. Batch fermentation of raw non-  
12 detoxified acid-pretreated bagasse hydrolysate with remaining solid particles  
13 revealed challenges for xylitol productivity of both FMYX and CENPKX, still the  
14 first was able to produce three times more xylitol than the laboratory. These  
15 results dialogue with what we have observed in optimal conditions fermentation,  
16 regarding glucose repression in CENPKX and better overall performance of  
17 FMYX. Here, besides the intrinsic ability of FMYX to produce more xylitol  
18 compared to CENPKX, the documented robustness of the industrial strain  
19 towards second-generation inhibitors also contributes to its achievement.  
20 Nevertheless, the recalcitrant hydrolysate with remaining solid particles  
21 prevented the full metabolization of xylose by FMYX, and operational  
22 improvements are presumed necessary.

23 Finally, an investigation to understand the contrasting performance  
24 regarding xylitol productivity between FMYX and CENPKX was performed.  
25 While superior xylitol titre produced by FMYX in the sugarcane bagasse  
26 hydrolysate might be related to the strain's robustness towards fermentation  
27 inhibitors [22], this shouldn't elucidate why the industrial background  
28 outperformed CENPKX in optimal cultivation conditions. Xylitol conversion to  
29 xylulose through an endogenous XDH activity could reduce xylitol yields, once  
30 xylose would be further metabolized into ethanol. Even so, higher  
31 concentrations of this alcohol were produced by FMYX, suggesting that *XYL2*  
32 activity did not impair CENPKX's xylitol production. At last, quantification of

1 cofactor NADPH - participating in XR activity - revealed an outstanding higher  
2 availability of this cofactor in the industrial FMYX.

3 While efforts have been made to engineer cofactor preference in XR [15]  
4 or even to increase the flux through PPP by overexpressing a glucose-6-  
5 phosphate dehydrogenase to produce more NADPH [58], we deduce that  
6 tailored yeast strains might have an endogenous favorable redox potential.  
7 Therefore, industrial SA-1 represents a good chassis for genetic engineering  
8 not only for the already known robust phenotype, but also for the possibility of  
9 achieving better yields of reduced sugars catabolized by NADPH-dependent  
10 reductases.

## 11 **CONCLUSION**

12 This work has enabled the development and standardization of an  
13 efficient CRISPR-Cas9-based method for the metabolic engineering of industrial  
14 diploid *S. cerevisiae* strains applied in the bioethanol industry. Apart from the  
15 proof of concept of the method developed during this work - based on the *URA3*  
16 gene deletion and insertion into the PE-2 strain - this approach has been  
17 successfully used for efficient xylitol production in strains PE-2, SA-1, and  
18 CEN.PK-122. We have observed that the industrial background enabled a  
19 better xylitol productivity, in comparison to the laboratory control. Growth of  
20 transformed SA-1 and CEN.PK-122 in YPD<sub>X</sub> revealed that in cofactor-limiting  
21 scenarios, the first outperformed the second. NADPH quantification indicated a  
22 superior redox environment in SA-1, suggesting that yeast strains applied in  
23 harsh industrial processes might have a better cofactor regeneration trait and  
24 are good chassis for metabolic engineering. Finally, it is important to note that  
25 fermentation of raw sugarcane bagasse hydrolysate did not result in good xylitol  
26 yields, indicating a technological bottleneck for the use of *S. cerevisiae* in the  
27 same operational conditions that E2G is now produced.

## 28 **LIST OF ABBREVIATIONS**

29 CRISPR: Clustered Regularly Interspaced Short Palindromic Repeats

30 Cas9: CRISPR associated protein 9



- 1 dsOligos:donor DNAs
- 2 E2G: Second-Generation Bioethanol
- 3 HMF: 5-hydroxymethylfurfural
- 4 HPLC: High performance liquid chromatography
- 5 LB: Luria-Bertani
- 6 KO: Knock-out
- 7 NoNAG: NGG PAM sequences
- 8 nt: nucleotide
- 9 OD: Optical density
- 10 PCR: Polymerase chain reactions
- 11 PE-2: Pedra-2
- 12 sgRNA: Single-guided RNA
- 13 SNP: Single nucleotide polymorphisms
- 14 SS: Salmon Sperm
- 15 YPD: Yeast Extract Peptone and Dextrose
- 16 XR: Xylose Reductase

## 17 **AUTHOR'S CONTRIBUTION**

18 GT conceived the present idea and FM conceptualized the paper. GT  
19 and GP supervised the study. FM, CM, AC and GT designed the experimental  
20 outline. CM and SN worked on the sgRNA analysis. CM carried out the CRISPR  
21 protocol procedures. CM, FM and FS produced transformed strains. FM, FS  
22 and BV performed the xylose cultivation in defined media. FM performed the  
23 NADPH quantification assay. CV, TS and FM did the sugarcane hydrolysate  
24 fermentation. FS, CV, TS, MS and RG helped with HPLC analysis. FM and CM

1 wrote the manuscript, with inputs from CV. All authors read and approved the  
2 final manuscript.

### 3 **DECLARATION OF COMPETING INTEREST**

4 The authors have no conflicts of interest to declare.

### 5 **AVAILABILITY OF DATA AND MATERIALS**

6 The datasets used and/or analyzed during the current study are available  
7 from the corresponding author on reasonable request.

### 8 **ACKNOWLEDGMENTS**

9 We want to thank Prof. Dr. Marcelo Carazzolle from The University of  
10 Campinas (Brazil) for assisting the sgRNA analysis in PE-2 and SA-1 genomes.

### 11 **FUNDING**

12 This study was financed by the *Fundação de Amparo à Pesquisa do*  
13 *Estado de São Paulo* (FAPESP, São Paulo, Brazil) through a scholarship to FM  
14 (grant number 2015/06677-8), CM (grant number 2018/03403-2) and GS  
15 (BIOEN grant number 2016/02506-7).

### 16 **ETHICS APPROVAL AND CONSENT TO PARTICIPATE**

17 Not applicable.

### 18 **CONSENT FOR PUBLICATION**

19 Not applicable.

### 20 **FIGURE LEGENDS**

21 **Figure 1:** Single-guided RNA (sgRNA) prospection in bioethanol *S. cerevisiae*  
22 strains. Sequences predicted for model yeast S288c were used for comparison.  
23 **A.** sgRNA suitability for JAY291 (PE-2 segregant). **B.** sgRNA suitability for  
24 FMY097 (SA-1 segregant).

25 **Figure 2:** Standardization of a CRISPR-Cas9 system for the genome editing of  
26 diploid industrial strains with plasmid pGS (Cas9 + sgRNA scaffold), using

1 JAY270 (PE-2 derived) as a proof of concept. **A.** Editing efficiency of the *URA3*  
2 *locus* knock-out using different concentrations of plasmid pGS and a 90bp-long  
3 donor DNA. **B.** Editing efficiency of the *URA3 locus* knock-in using different  
4 donor overhang homologies to the editing site.

5 **Figure 3:** A prospect of xylitol productivity in engineered industrial *S. cerevisiae*  
6 strains. **A.** Xylitol productivity of wild-type and xylose reductase-expressing  
7 (*hoΔ::xyl1*) strains PE-2, SA-1 and laboratory CEN.PK-122 in semi-anaerobic  
8 batch fermentation with YPDX (0.5/2%) after 120 hours. **B.** Xylitol productivity in  
9 the presence of varying HMF concentration of strains FMYX and CENPKX in  
10 semi-anaerobic batch fermentation with YPDX (0.5/2%) after 120 hours.  
11 Asterisk (\*) represents statistically different averages between bars (p-value <  
12 0.05).

13 **Figure 4:** Xylitol productivity of strains FMYX (green on the left) and CENPKX  
14 (yellow on the right) in varying cultivation conditions. Filled symbols (●/□/▲)  
15 represent xylose and empty (○/□/□), xylitol. **A.** Aerobic cultivation with an initial  
16 optical density (OD<sub>600nm</sub>) of 0.5, 20 g/L xylose and different glucose  
17 concentrations: 10 g/L (●/○), 20 g/L (□/□) or 30 g/L (▲/□) of the cosubstrate. **B.**  
18 Cultivation in 20 g/L xylose, 30 g/L glucose, initial OD<sub>600nm</sub> of 0.5 and varying  
19 oxygenation scenarios: semi-anaerobic (▲/□) and aerobic (●/○). **C.** Aerobic  
20 cultivation with 20 g/L xylose, 30 g/L glucose and different cell mass for  
21 inoculum: OD<sub>600nm</sub> 0.5 (▲/□) or OD<sub>600nm</sub> 1.0 (●/○).

22 **Figure 5:** Batch fermentation of raw sugarcane bagasse hydrolysate with  
23 remaining solid particles and full aeration for xylitol production by strains FMYX  
24 (**A**) and CENPKX (**B**). Curves represent consumption of glucose (●) and xylose  
25 (□), or production of ethanol (▲) and xylitol (○).

26 **Figure 6:** Relative NADPH quantification using a luminescence assay for wild-  
27 type (WT) and genetically modified (*hoΔ::xyl1*) strains SA-1 and CEN.PK-122.  
28 Asterisks (\*\*) represent statistically different averages between bars (p-value <  
29 0.001).

## 30 ADDITIONAL FILES

### 31 Additional File 1

- 1 **Format:** Table (XLS)
- 2 **Title: Supplementary Table S1**
- 3 **Description:** Main primers used in this study.
- 4
- 5 **Additional File 2**
- 6 **Format:** Table (CSV)
- 7 **Title: Supplementary Table S2**
- 8 **Description:** sgRNA prospect in PE-2.
- 9
- 10 **Additional File 3**
- 11 **Format:** Table (CSV)
- 12 **Title: Supplementary Table S3**
- 13 **Description:** sgRNA prospect in SA-1.
- 14
- 15 **Additional File 4**
- 16 **Format:** Image (PDF)
- 17 **Title: Supplementary Figure S1**
- 18 **Description:** Cloning procedures for using pGS in a CRISPR-Cas9 editing
- 19 event.
- 20
- 21 **Additional File 5**
- 22 **Format:** Image (PDF)
- 23 **Title: Supplementary Figure S2**
- 24 **Description:** Transformation efficiency of the *LEU2* locus knockout in LVY34.4
- 25 (PE-2, MATa).
- 26
- 27 **Additional File 6**
- 28 **Format:** Image (PDF)
- 29 **Title: Supplementary Figure S3**
- 30 **Description:** Testing of sgRNAs targeting the *HO* locus in strains CEN.PK-122,
- 31 SA-1 and PE-2.
- 32
- 33 **Additional File 7**
- 34 **Format:** Image (PDF)
- 35 **Title: Supplementary Figure S4**
- 36 **Description:** Testing of the fitness of strains PE-2, SA-1 and CEN.PK-122 with
- 37 a *hoΔ* genotype.
- 38
- 39 **Additional File 8**
- 40 **Format:** Image (PDF)
- 41 **Title: Supplementary Figure S5**
- 42 **Description:** Editing efficiency of strains PE-2, CEN.PK-122 and
- 43 FMY097/FMY034 (SA-1 segregants) for integration of a xylose reductase
- 44 cassette.

# 1 TABLES

**Table 1:** Main *S. cerevisiae* strains and plasmids used in this work.

| <b><i>S. cerevisiae</i> strains</b> | <b>Relevant genotype</b>                                | <b>Source</b>             |
|-------------------------------------|---------------------------------------------------------|---------------------------|
| JAY270                              | MATa/MATα (PE-2 derived)                                | (Argueso et al., 2009)    |
| JAY270ΔURA3                         | JAY270 <i>ura3</i> Δ                                    | This work                 |
| JAY270ΔHO                           | JAY270 <i>ho</i> Δ                                      | This work                 |
| JAYX                                | JAY270 <i>ho</i> Δ:: <i>xy11</i>                        | This work                 |
| FMY001                              | MATa/MATα (SA-1 derived)                                | (de Mello et al., 2019)   |
| FMY001ΔHO                           | FMY001 <i>ho</i> Δ                                      | This work                 |
| FMYX                                | FMY001 <i>ho</i> Δ:: <i>xy11</i>                        | This work                 |
| CEN.PK-122                          | MATa/MATα MAL2-8c SUC2                                  | (van Dijken et al., 2000) |
| CEN.PK-122ΔHO                       | CEN.PK-122 <i>ho</i> Δ                                  | This work                 |
| CENPKX                              | CEN.PK-122 <i>ho</i> Δ:: <i>xy11</i>                    | This work                 |
| <b>Plasmids</b>                     | <b>Relevant feature</b>                                 | <b>Source</b>             |
| p425_GPD                            | LEU2 GAPp_CYC1t                                         | (Mumberg et al., 1995)    |
| p425_XYL1                           | LEU2 GAPp_PsXYL1_CYC1t                                  | This work                 |
| pGS                                 | pTEF1-Cas9-tCYC1; pSNR52-sgRNA-tSUP4                    | This work                 |
| pGS.29                              | gRNA sequence targeting <i>HO</i> in Industrial strains | This work                 |
| pGS.30                              | gRNA sequence targeting <i>HO</i> in CEN.PK-122         | This work                 |

# 2

**Table 2:** Xylitol productivity of strains FMYX and CENPKX in YPDx under varying cultivation con

| <b>Experiment</b>                                                                        | <b>Strain</b> | <b>Varying Condition</b> | <b>Xylitol</b>     |                    |
|------------------------------------------------------------------------------------------|---------------|--------------------------|--------------------|--------------------|
|                                                                                          |               |                          | <b>Titre (g/L)</b> | <b>Yield (g/g)</b> |
| <i>Co-substrate ratio</i><br>fixed 20 g/L xylose;<br>initial OD 0.5 and full<br>aeration | FMYX          | 10 g/L Glucose           | 13.06 ± 1.03 a     | 0.78 ± 0.06 a      |
|                                                                                          |               | 20 g/L Glucose           | 15.60 ± 3.71 a     | 0.80 ± 0.20 a      |
|                                                                                          |               | 30 g/L Glucose           | 15.74 ± 0.36 a*    | 0.91 ± 0.02 a      |
|                                                                                          | CENPKX        | 10 g/L Glucose           | 14.29 ± 0.89 ab    | 0.83 ± 0.06 a      |
|                                                                                          |               | 20 g/L Glucose           | 14.54 ± 0.09 a     | 0.74 ± 0.00 a      |
|                                                                                          |               | 30 g/L Glucose           | 12.84 ± 0.27 b     | 0.69 ± 0.02 b      |
| <i>Aeration</i><br>fixed 20 g/L xylose; 30<br>g/L glucose and initial<br>OD 0.5          | FMYX          | Aerobic                  | 15.74 ± 0.36 a*    | 0.91 ± 0.02 a      |
|                                                                                          |               | Semi-anaerobic           | 10.75 ± 1.51 b     | 0.71 ± 0.04 b      |
|                                                                                          | CENPKX        | Aerobic                  | 12.84 ± 0.27 a     | 0.69 ± 0.02 a      |
|                                                                                          |               | Semi-anaerobic           | 9.92 ± 0.39 b      | 0.78 ± 0.05 a      |

|                                                                                              |        |        |              |    |             |   |
|----------------------------------------------------------------------------------------------|--------|--------|--------------|----|-------------|---|
| <i>Inoculum concentration</i><br>fixed 20 g/L xylose; 30<br>g/L glucose and full<br>aeration | FMYX   | OD 0.5 | 15.74 ± 0.36 | b* | 0.91 ± 0.02 | a |
|                                                                                              |        | OD 1.0 | 16.97 ± 0.10 | a* | 0.93 ± 0.02 | a |
|                                                                                              | CENPKX | OD 0.5 | 12.84 ± 0.27 | b  | 0.69 ± 0.02 | b |
|                                                                                              |        | OD 1.0 | 15.38 ± 0.24 | a  | 0.83 ± 0.01 | a |

Letters (a,b,c) represent statistical differences (Tukey test) observed in different cultivation conditions within the same experiment. Asterisk (\*) represent statistical difference (Tukey test) observed between strains within the same experiment conditions.

**Table 3:** Sugarcane bagasse hydrolysate composition.

| Analyte     | Composition (g/L) |
|-------------|-------------------|
| Glucose     | 49.87 ± 7.12      |
| Xylose      | 23.95 ± 3.66      |
| Acetic Acid | 5.84 ± 0.78       |
| Formic Acid | 1.33 ± 0.27       |
| HMF         | 0.59 ± 0.01       |
| Furfural    | 1.20 ± 0.07       |

**Table 4:** Xylitol productivity of strains FMYX and CENPKX in sugarcane bagasse hydrolysate.

| Strain | Xylitol     |   |                      |   |
|--------|-------------|---|----------------------|---|
|        | Titre (g/L) |   | Productivity (g/L.h) |   |
| FMYX   | 3.65 ± 0.16 | * | 0.04 ± 0.00          | * |
| CENPKX | 1.56 ± 0.19 |   | 0.02 ± 0.01          |   |

Asterisk (\*) represent statistical differences (Tukey test) observed between strains.

## REFERENCES

- [1] Jenkins B, Baptista P, Porth M. Collaborating for Change in Sugar Production: Building Blocks for Sustainability at Scale 2015.
- [2] Dasgupta D, Bandhu S, Adhikari DK, Ghosh D. Challenges and prospects of xylitol production with whole cell bio-catalysis: A review. Microbiol Res 2017;197:9–21. <https://doi.org/10.1016/j.micres.2016.12.012>.
- [3] Cheng K-K, Wu J, Lin Z-N, Zhang J-A. Aerobic and sequential anaerobic

- 1 fermentation to produce xylitol and ethanol using non-detoxified acid  
2 pretreated corncob. *Biotechnol Biofuels* 2014;7:166.  
3 <https://doi.org/10.1186/s13068-014-0166-y>.
- 4 [4] Franceschin G, Sudiro M, Ingram T, Smirnova I, Brunner G, Bertucco A.  
5 Conversion of rye straw into fuel and xylitol: A technical and economical  
6 assessment based on experimental data. *Chem Eng Res Des*  
7 2011;89:631–40. <https://doi.org/10.1016/j.cherd.2010.11.001>.
- 8 [5] Tamburini E, Costa S, Marchetti M, Pedrini P. Optimized Production of  
9 Xylitol from Xylose Using a Hyper-Acidophilic *Candida tropicalis*.  
10 *Biomolecules* 2015;5:1979–89. <https://doi.org/10.3390/biom5031979>.
- 11 [6] Edelstein S, Smith K, Worthington A, Gillis N, Bruen D, Kang SH, et al.  
12 Comparisons of Six New Artificial Sweetener Gradation Ratios with  
13 Sucrose in Conventional-Method Cupcakes Resulting in Best Percentage  
14 Substitution Ratios. *J Culin Sci Technol* 2008;5:61–74.  
15 [https://doi.org/10.1300/j385v05n04\\_05](https://doi.org/10.1300/j385v05n04_05).
- 16 [7] Zacharis C. Xylitol. *Sweeten. Sugar Altern. Food Technol.*, Oxford, UK:  
17 Wiley-Blackwell; 2012, p. 347–82.  
18 <https://doi.org/10.1002/9781118373941.ch16>.
- 19 [8] Janakiram C, Deepan Kumar C, Joseph J. Xylitol in preventing dental  
20 caries: A systematic review and meta-analyses. *J Nat Sci Biol Med*  
21 2017;8:16. <https://doi.org/10.4103/0976-9668.198344>.
- 22 [9] Yin SY, Kim HJ, Kim H-J. Protective effect of dietary xylitol on influenza A  
23 virus infection. *PLoS One* 2014;9:e84633.  
24 <https://doi.org/10.1371/journal.pone.0084633>.
- 25 [10] Felipe Hernández-Pérez A, de Arruda PV, Sene L, da Silva SS, Kumar  
26 Chandel A, de Almeida Felipe M das G. Xylitol bioproduction: state-of-the-  
27 art, industrial paradigm shift, and opportunities for integrated biorefineries.  
28 *Crit Rev Biotechnol* 2019;39:924–43.  
29 <https://doi.org/10.1080/07388551.2019.1640658>.
- 30 [11] Rafiqul ISM, Sakinah AMM. Processes for the Production of Xylitol-A



- 1           Review.           Food           Rev           Int           2013;29:127–56.
- 2           <https://doi.org/10.1080/87559129.2012.714434>.
- 3   [12] Winkelhausen E, Kuzmanova S. Microbial conversion of d-xylose to
- 4           xylitol. *J Ferment Bioeng* 1998;86:1–14. [https://doi.org/10.1016/S0922-](https://doi.org/10.1016/S0922-338X(98)80026-3)
- 5           338X(98)80026-3.
- 6   [13] Baptista SL, Costa CE, Cunha JT, Soares PO, Domingues L. Metabolic
- 7           engineering of *Saccharomyces cerevisiae* for the production of top value
- 8           chemicals from biorefinery carbohydrates. *Biotechnol Adv*
- 9           2021;47:107697. <https://doi.org/10.1016/j.biotechadv.2021.107697>.
- 10   [14] Kwak S, Jin YS. Production of fuels and chemicals from xylose by
- 11           engineered *Saccharomyces cerevisiae*: A review and perspective. *Microb*
- 12           *Cell Fact* 2017;16:82. <https://doi.org/10.1186/s12934-017-0694-9>.
- 13   [15] Baptista SL, Cunha JT, Romaní A, Domingues L. Xylitol production from
- 14           lignocellulosic whole slurry corn cob by engineered industrial
- 15           *Saccharomyces cerevisiae* PE-2. *Bioresour Technol* 2018;267:481–91.
- 16           <https://doi.org/10.1016/j.biortech.2018.07.068>.
- 17   [16] Guirimand G, Sasaki K, Inokuma K, Bamba T, Hasunuma T, Kondo A.
- 18           Cell surface engineering of *Saccharomyces cerevisiae* combined with
- 19           membrane separation technology for xylitol production from rice straw
- 20           hydrolysate. *Appl Microbiol Biotechnol* 2016;100:3477–87.
- 21           <https://doi.org/10.1007/s00253-015-7179-8>.
- 22   [17] Kogje A, Ghosalkar A. Xylitol production by *Saccharomyces cerevisiae*
- 23           overexpressing different xylose reductases using non-detoxified
- 24           hemicellulosic hydrolysate of corncob. *3 Biotech* 2016;6:127.
- 25           <https://doi.org/10.1007/s13205-016-0444-4>.
- 26   [18] Kogje AB, Ghosalkar A. Xylitol production by genetically modified
- 27           industrial strain of *Saccharomyces cerevisiae* using glycerol as co-
- 28           substrate. *J Ind Microbiol Biotechnol* 2017;44:961–71.
- 29           <https://doi.org/10.1007/s10295-017-1914-3>.
- 30   [19] Cai Z, Zhang B, Li Y. Engineering *Saccharomyces cerevisiae* for efficient

- 1 anaerobic xylose fermentation: Reflections and perspectives. *Biotechnol J*  
2 2012;7:34–46. <https://doi.org/10.1002/biot.201100053>.
- 3 [20] Basso LC, de Amorim H V, de Oliveira AJ, Lopes ML. Yeast selection for  
4 fuel ethanol production in Brazil. *FEMS Yeast Res* 2008;8:1155–63.  
5 <https://doi.org/10.1111/j.1567-1364.2008.00428.x>.
- 6 [21] dos Santos LV, Carazzolle MF, Nagamatsu ST, Sampaio NMV, Almeida  
7 LD, Pirolla RAS, et al. Unraveling the genetic basis of xylose consumption  
8 in engineered *Saccharomyces cerevisiae* strains. *Sci Rep* 2016;6:38676.  
9 <https://doi.org/10.1038/srep38676>.
- 10 [22] de Mello FDSB, Coradini ALV, Tizei PAG, Carazzolle MF, Pereira GAG,  
11 Teixeira GS. Static microplate fermentation and automated growth  
12 analysis approaches identified a highly-aldehyde resistant  
13 *Saccharomyces cerevisiae* strain. *Biomass and Bioenergy* 2019;120.  
14 <https://doi.org/10.1016/j.biombioe.2018.10.019>.
- 15 [23] Stovicek V, Borodina I, Forster J. CRISPR–Cas system enables fast and  
16 simple genome editing of industrial *Saccharomyces cerevisiae* strains.  
17 *Metab Eng Commun* 2015;2:13–22.  
18 <https://doi.org/10.1016/j.meten.2015.03.001>.
- 19 [24] Argueso JJJ, Carazzolle MMF, Mieczkowski P a, Duarte FM, Netto OVC,  
20 Missawa SK, et al. Genome structure of a *Saccharomyces cerevisiae*  
21 strain widely used in bioethanol production. *Genome Res* 2009;19:2258–  
22 70. <https://doi.org/10.1101/gr.091777.109>.
- 23 [25] DiCarlo JE, Norville JE, Mali P, Rios X, Aach J, Church GM. Genome  
24 engineering in *Saccharomyces cerevisiae* using CRISPR-Cas systems.  
25 *Nucleic Acids Res* 2013;41:4336–43. <https://doi.org/10.1093/nar/gkt135>.
- 26 [26] Nagamatsu ST, Teixeira GS, de Mello F da SB, Tizei PAG, Nakagawa  
27 BTG, de Carvalho LM, et al. Genome Assembly of a Highly Aldehyde-  
28 Resistant *Saccharomyces cerevisiae* SA1-Derived Industrial Strain.  
29 *Microbiol Resour Announc* 2019;8:e00071-19.  
30 <https://doi.org/10.1128/MRA.00071-19>.

- 1 [27] Labun K, Montague TG, Krause M, Torres Cleuren YN, Tjeldnes H, Valen  
2 E. CHOPCHOP v3: expanding the CRISPR web toolbox beyond genome  
3 editing. Nucleic Acids Res 2019;47:W171–4.  
4 <https://doi.org/10.1093/nar/gkz365>.
- 5 [28] Laughery MF, Hunter T, Brown A, Hoopes J, Ostbye T, Shumaker T, et  
6 al. New vectors for simple and streamlined CRISPR-Cas9 genome editing  
7 in *Saccharomyces cerevisiae*. Yeast 2015;32:711–20.  
8 <https://doi.org/10.1002/yea.3098>.
- 9 [29] Mumberg D, Müller R, Funk M. Yeast vectors for the controlled  
10 expression of heterologous proteins in different genetic backgrounds.  
11 Gene 1995;156:119–22. [https://doi.org/10.1016/0378-1119\(95\)00037-7](https://doi.org/10.1016/0378-1119(95)00037-7).
- 12 [30] Birnboim HC, Doly J. A rapid alkaline extraction procedure for screening  
13 recombinant plasmid DNA. Nucleic Acids Res 1979;7:1513–23.  
14 <https://doi.org/10.1093/nar/7.6.1513>.
- 15 [31] Green MR, Sambrook J. Rapid Isolation of Yeast DNA. Cold Spring Harb  
16 Protoc 2018;2018:pdb.prot093542.  
17 <https://doi.org/10.1101/pdb.prot093542>.
- 18 [32] Gietz RD, Schiestl RH. High-efficiency yeast transformation using the  
19 LiAc/SS carrier DNA/PEG method. Nat Protoc 2007;2:31–4.  
20 <https://doi.org/10.1038/nprot.2007.13>.
- 21 [33] Dower WJ, Miller JF, Ragsdale CW. High efficiency transformation of  
22 *E.coli* by high voltage electroporation. Nucleic Acids Res 1988;16:6127–  
23 45. <https://doi.org/10.1093/nar/16.13.6127>.
- 24 [34] Nijkamp JF, van den Broek M, Datema E, de Kok S, Bosman L, Luttik M  
25 a, et al. De novo sequencing, assembly and analysis of the genome of the  
26 laboratory strain *Saccharomyces cerevisiae* CEN.PK113-7D, a model for  
27 modern industrial biotechnology. Microb Cell Fact 2012;11:36.  
28 <https://doi.org/10.1186/1475-2859-11-36>.
- 29 [35] Haber JE. Exploring the pathways of homologous recombination. Curr  
30 Opin Cell Biol 1992;4:401–12. <https://doi.org/10.1016/0955->

1           0674(92)90005-W.

2   [36] dos Santos LV, de Barros Grassi MC, Gallardo JCM, Pirolla RAS,  
3       Calderón LL, de Carvalho-Netto OV, et al. Second-Generation Ethanol:  
4       The Need is Becoming a Reality. *Ind Biotechnol* 2016;12:40–57.  
5       <https://doi.org/10.1089/ind.2015.0017>.

6   [37] Hallborn J, Meinander N, Hahn-Hägerdal B, Gorwa M-F, Penttälä M,  
7       Keränen S. The influence of cosubstrate and aeration on xylitol formation  
8       by recombinant *Saccharomyces cerevisiae* expressing theXYL1 gene.  
9       *Appl Microbiol Biotechnol* 1994;42:326–33.  
10      <https://doi.org/10.1007/BF00902737>.

11   [38] Patiño MA, Ortiz JP, Velásquez M, Stambuk BU. d-Xylose consumption  
12      by nonrecombinant *Saccharomyces cerevisiae*: A review. *Yeast*  
13      2019;36:yea.3429. <https://doi.org/10.1002/yea.3429>.

14   [39] Peter J, De Chiara M, Friedrich A, Yue J-X, Pflieger D, Bergström A, et al.  
15      Genome evolution across 1,011 *Saccharomyces cerevisiae* isolates.  
16      *Nature* 2018;556:339–44. <https://doi.org/10.1038/s41586-018-0030-5>.

17   [40] Bao Z, Xiao H, Liang J, Zhang L, Xiong X, Sun N, et al. Homology-  
18      Integrated CRISPR–Cas (HI-CRISPR) System for One-Step Multigene  
19      Disruption in *Saccharomyces cerevisiae*. *ACS Synth Biol* 2015;4:585–94.  
20      <https://doi.org/10.1021/sb500255k>.

21   [41] Degreif D, Kremenovic M, Geiger T, Bertl A. Preloading budding yeast  
22      with all-in-one CRISPR/Cas9 vectors for easy and high-efficient genome  
23      editing. *J Biol Methods* 2018;5:e98.  
24      <https://doi.org/10.14440/jbm.2018.254>.

25   [42] Generoso WC, Gottardi M, Oreb M, Boles E. Simplified CRISPR-Cas  
26      genome editing for *Saccharomyces cerevisiae*. *J Microbiol Methods*  
27      2016;127:203–5. <https://doi.org/10.1016/j.mimet.2016.06.020>.

28   [43] Reider Apel A, D’Espaux L, Wehrs M, Sachs D, Li RA, Tong GJ, et al. A  
29      Cas9-based toolkit to program gene expression in *Saccharomyces*  
30      *cerevisiae*. *Nucleic Acids Res* 2017;45:496–508.

- 1        <https://doi.org/10.1093/nar/gkw1023>.
- 2    [44] Ryan OW, Skerker JM, Maurer MJ, Li X, Tsai JC, Poddar S, et al.  
3        Selection of chromosomal DNA libraries using a multiplex CRISPR  
4        system. *Elife* 2014;3. <https://doi.org/10.7554/eLife.03703>.
- 5    [45] Hu G, Luo S, Rao H, Cheng H, Gan X. A Simple PCR-based Strategy for  
6        the Introduction of Point Mutations in the Yeast *Saccharomyces*  
7        *cerevisiae* via CRISPR/Cas9. *Biochem Mol Biol J* 2018;04.  
8        <https://doi.org/10.21767/2471-8084.100058>.
- 9    [46] Li H, Wu M, Xu L, Hou J, Guo T, Bao X, et al. Evaluation of industrial  
10       *Saccharomyces cerevisiae* strains as the chassis cell for  
11       second-generation bioethanol production. *Microb Biotechnol* 2015;8:266–  
12       74. <https://doi.org/10.1111/1751-7915.12245>.
- 13   [47] Piskur J, Rozpedowska E, Polakova S, Merico A, Compagno C. How did  
14       *Saccharomyces* evolve to become a good brewer? *Trends Genet*  
15       2006;22:183–6. <https://doi.org/10.1016/j.tig.2006.02.002>.
- 16   [48] Russell DW, Jensen R, Zoller MJ, Burke J, Errede B, Smith M, et al.  
17       Structure of the *Saccharomyces cerevisiae* HO gene and analysis of its  
18       upstream regulatory region. *Mol Cell Biol* 1986;6:4281–94.  
19       <https://doi.org/10.1128/MCB.6.12.4281>.
- 20   [49] Almeida JRM, Bertilsson M, Hahn-Hägerdal B, Lidén G, Gorwa-  
21       Grauslund M-F. Carbon fluxes of xylose-consuming *Saccharomyces*  
22       *cerevisiae* strains are affected differently by NADH and NADPH usage in  
23       HMF reduction. *Appl Microbiol Biotechnol* 2009;84:751–61.  
24       <https://doi.org/10.1007/s00253-009-2053-1>.
- 25   [50] Jayakody LN, Hayashi N, Kitagaki H. Molecular mechanisms for  
26       detoxification of major aldehyde inhibitors for production of bioethanol by  
27       *Saccharomyces cerevisiae* from hot- compressed water-treated  
28       lignocellulose. *Formatex Res Cent* 2013:302–11.
- 29   [51] Subtil T, Boles E. Competition between pentoses and glucose during  
30       uptake and catabolism in recombinant *Saccharomyces cerevisiae*.

- 1        Biotechnol Biofuels 2012;5:14. <https://doi.org/10.1186/1754-6834-5-14>.
- 2    [52]   Carvalho LM, Carvalho-Netto O V, Calderón LL, Gutierrez M, de Assis  
3        MA, Mofatto LS, et al. Understanding the differences in 2G ethanol  
4        fermentative scales through omics data integration. FEMS Yeast Res  
5        2021;21. <https://doi.org/10.1093/femsyr/foab030>.
- 6    [53]   Hernández-Pérez AF, de Arruda PV, Felipe M das G de A. Sugarcane  
7        straw as a feedstock for xylitol production by *Candida guilliermondii* FTI  
8        20037.        Brazilian        J        Microbiol        2016;47:489–96.  
9        <https://doi.org/10.1016/j.bjm.2016.01.019>.
- 10   [54]   Vaz de Arruda P, dos Santos JC, de Cássia Lacerda Brambilla Rodrigues  
11        R, da Silva DDV, Yamakawa CK, de Moraes Rocha GJ, et al. Scale up of  
12        xylitol production from sugarcane bagasse hemicellulosic hydrolysate by  
13        *Candida guilliermondii* FTI 20037. J Ind Eng Chem 2017;47:297–302.  
14        <https://doi.org/10.1016/j.jiec.2016.11.046>.
- 15   [55]   Baptista SL, Carvalho LC, Romaní A, Domingues L. Development of a  
16        sustainable bioprocess based on green technologies for xylitol production  
17        from corn cob. Ind Crops Prod 2020;156:112867.  
18        <https://doi.org/10.1016/j.indcrop.2020.112867>.
- 19   [56]   Guirimand G, Inokuma K, Bamba T, Matsuda M, Morita K, Sasaki K, et al.  
20        Cell-surface display technology and metabolic engineering of  
21        *Saccharomyces cerevisiae* for enhancing xylitol production from woody  
22        biomass.        Green        Chem        2019;21:1795–808.  
23        <https://doi.org/10.1039/C8GC03864C>.
- 24   [57]   Hong K-K, Nielsen J. Metabolic engineering of *Saccharomyces*  
25        *cerevisiae*: a key cell factory platform for future biorefineries. Cell Mol Life  
26        Sci 2012;69:2671–90. <https://doi.org/10.1007/s00018-012-0945-1>.
- 27   [58]   Jo J-H, Oh S-Y, Lee H-S, Park Y-C, Seo J-H. Dual utilization of NADPH  
28        and NADH cofactors enhances xylitol production in engineered  
29        *Saccharomyces cerevisiae*. Biotechnol J 2015;10:1935–43.  
30        <https://doi.org/10.1002/biot.201500068>.





**A**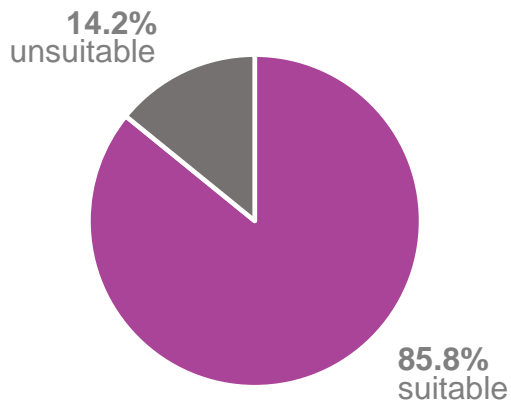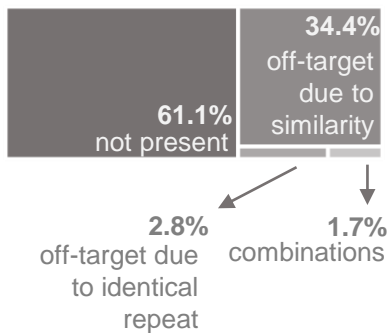**B**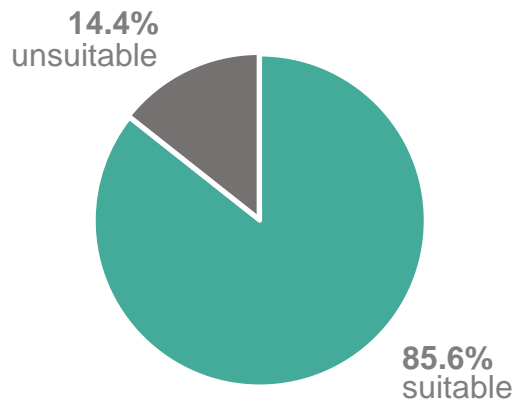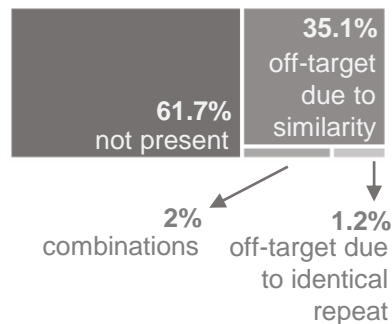

**A**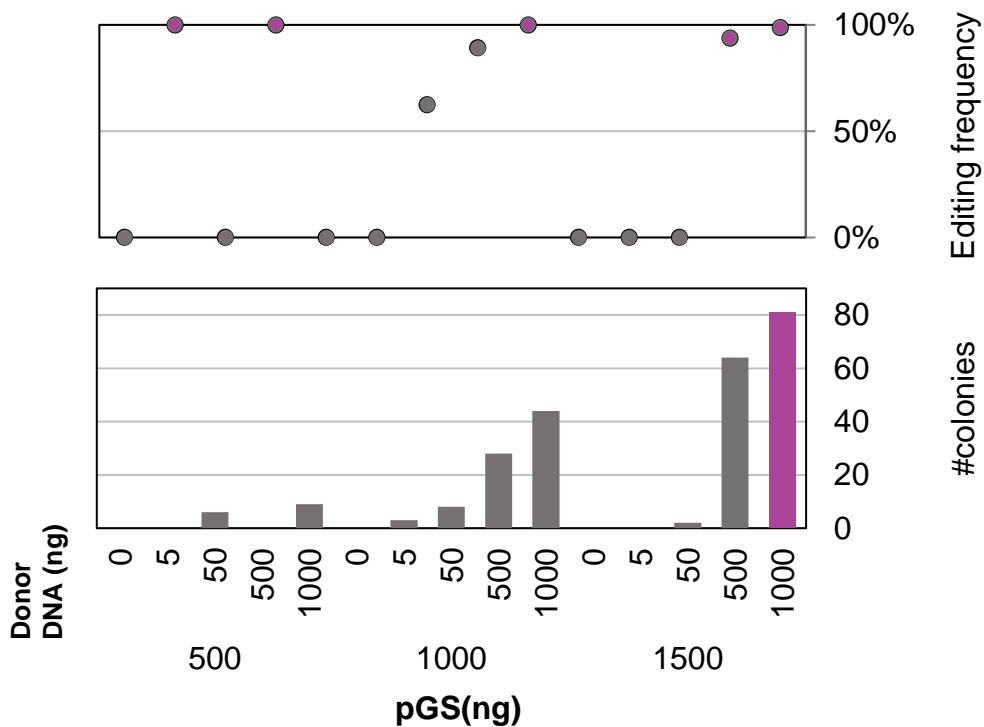**B**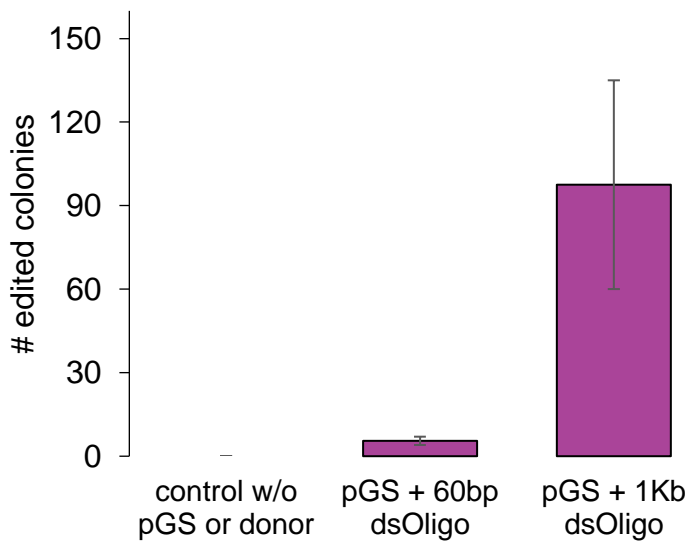

**A**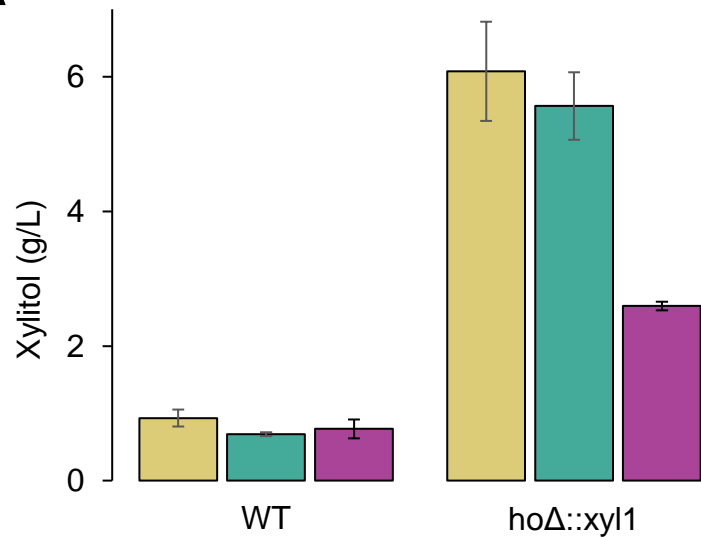**B**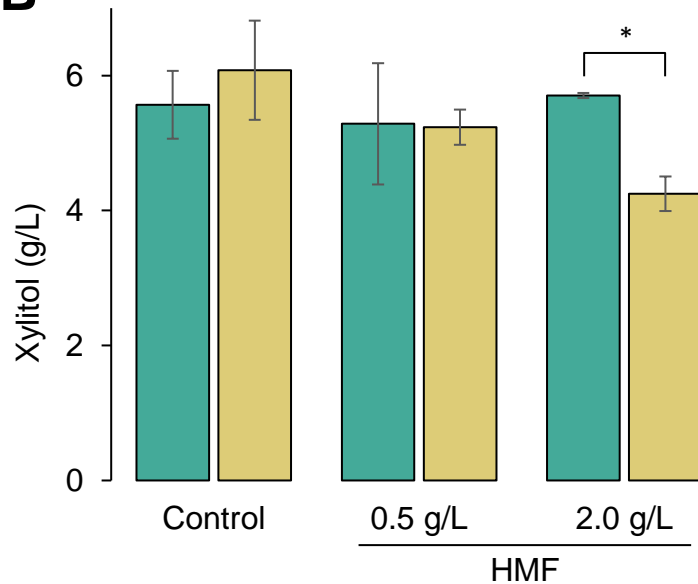

**A**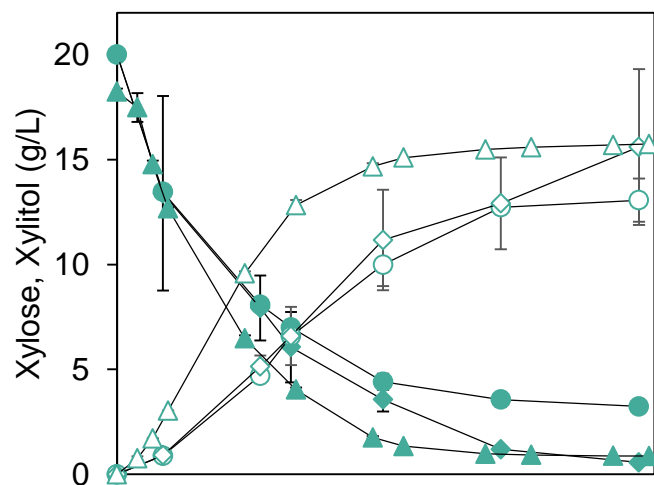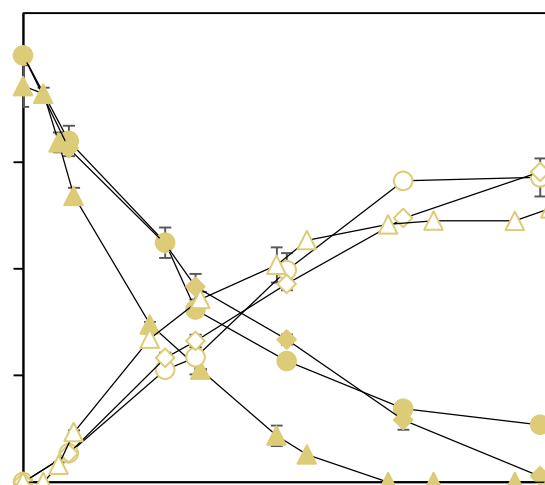**B**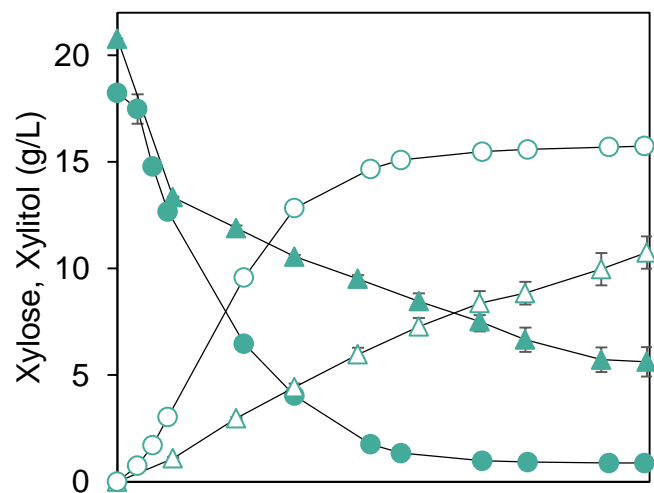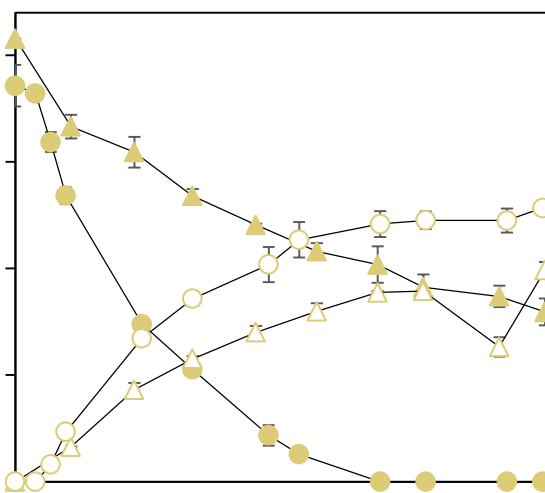**C**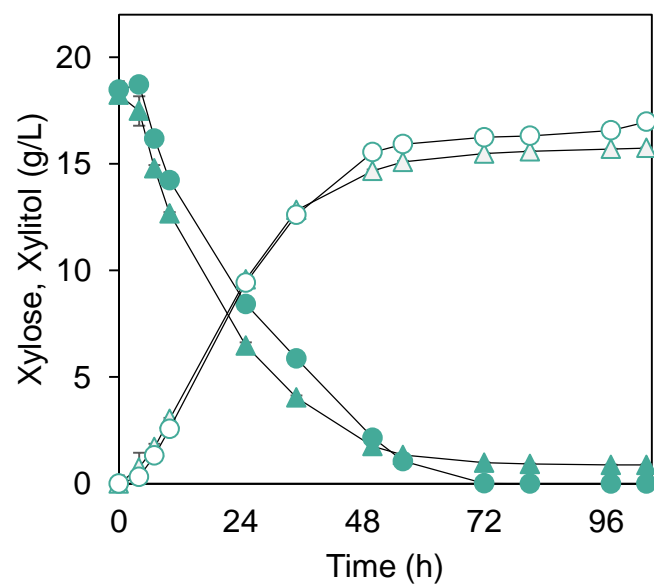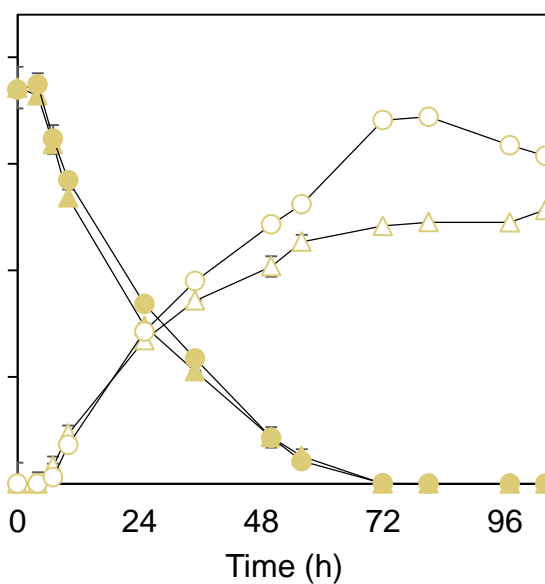

**A**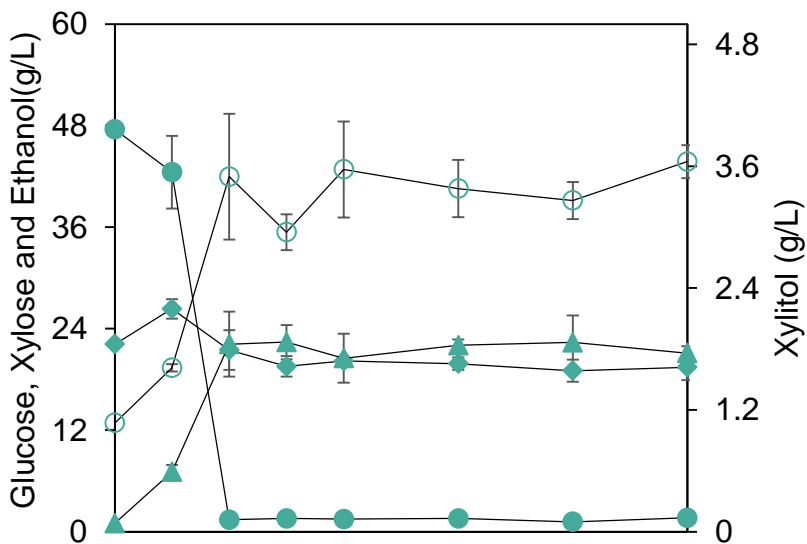**B**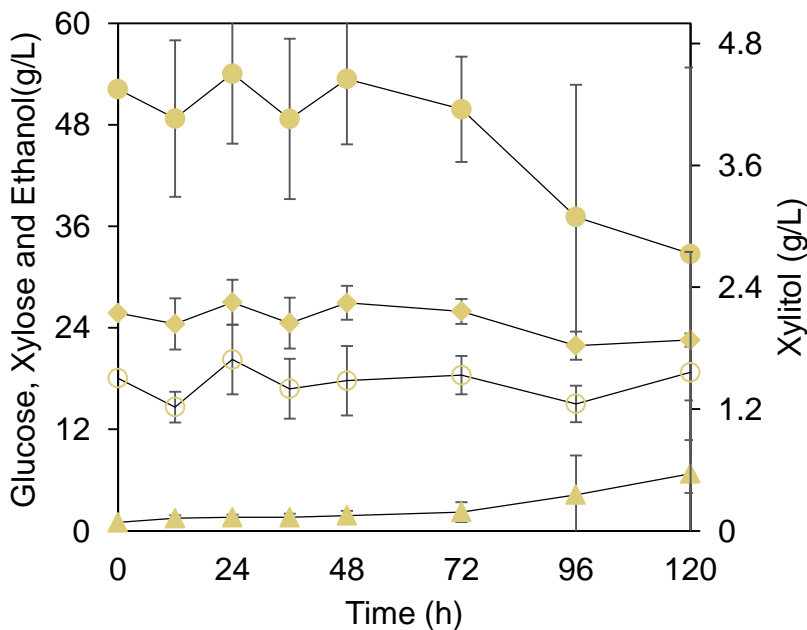

● Glucose    ◆ Xylose    ▲ Ethanol    ○ Xylitol

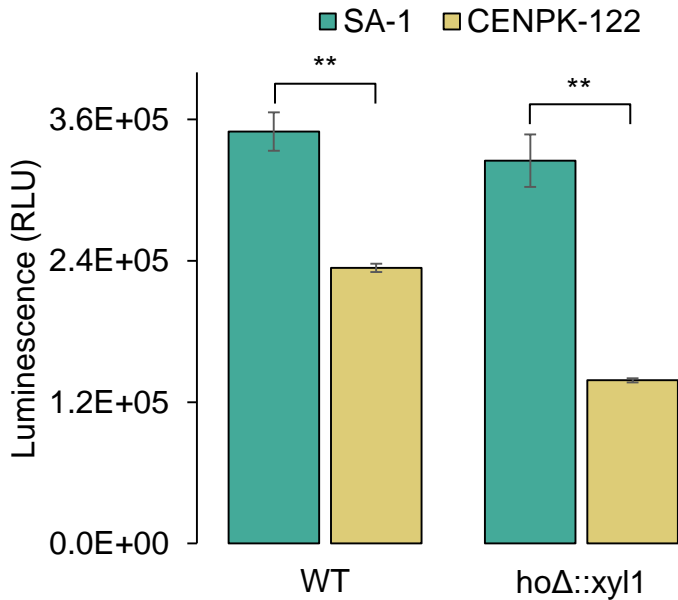

Source: http://biorxiv.org/content/10.1101/2021.12.08.471450v1.full.pdf
